# Supplementary material for: A phosphorescent Ir(iii) complex with formamide for the luminescence determination of low-level water content in organic solvents
Source: Royal Society of Chemistry journal article supplement (doi:10.1039/c6tc01586g), 2016-01-01
Supplement: c6tc01586g1.pdf [file c6tc01586g1.pdf]

## Electronic Supplementary Information

### **A phosphorescent Ir(III) complex with formamide for luminescent determination of low-level water content in organic solvents**

Song Guo,<sup>a</sup> Yun Ma,<sup>a</sup> Shujuan Liu,<sup>a</sup> Qi Yu,<sup>a</sup> Aqiang Xu,<sup>a</sup> Jianmei Han,<sup>a</sup> Liuwei Wei,<sup>a</sup> Qiang Zhao\*<sup>a</sup> and Wei Huang

## NMR and MALDI-TOF spectra

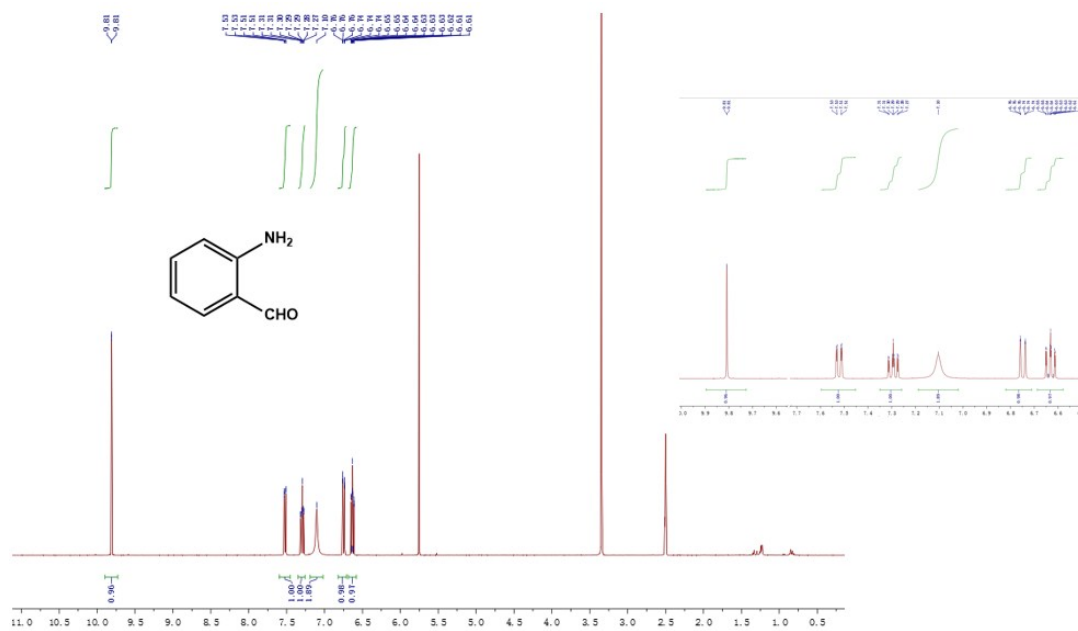

Fig. S1  $^1\text{H}$  NMR spectrum of compound 6.

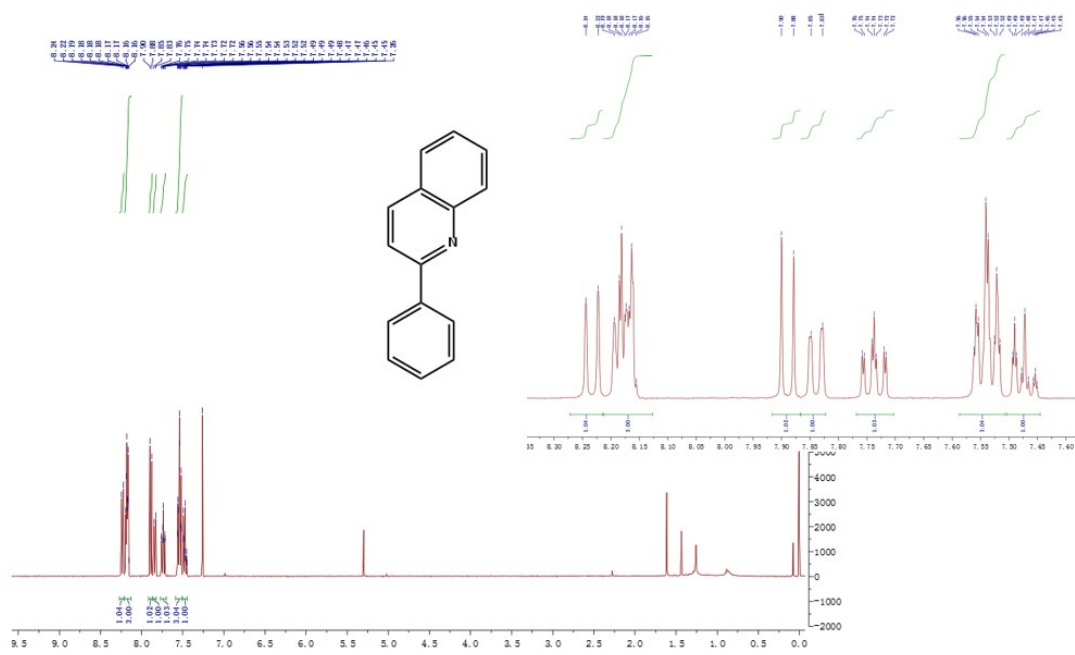

Fig. S2  $^1\text{H}$  NMR spectrum of compound 7.

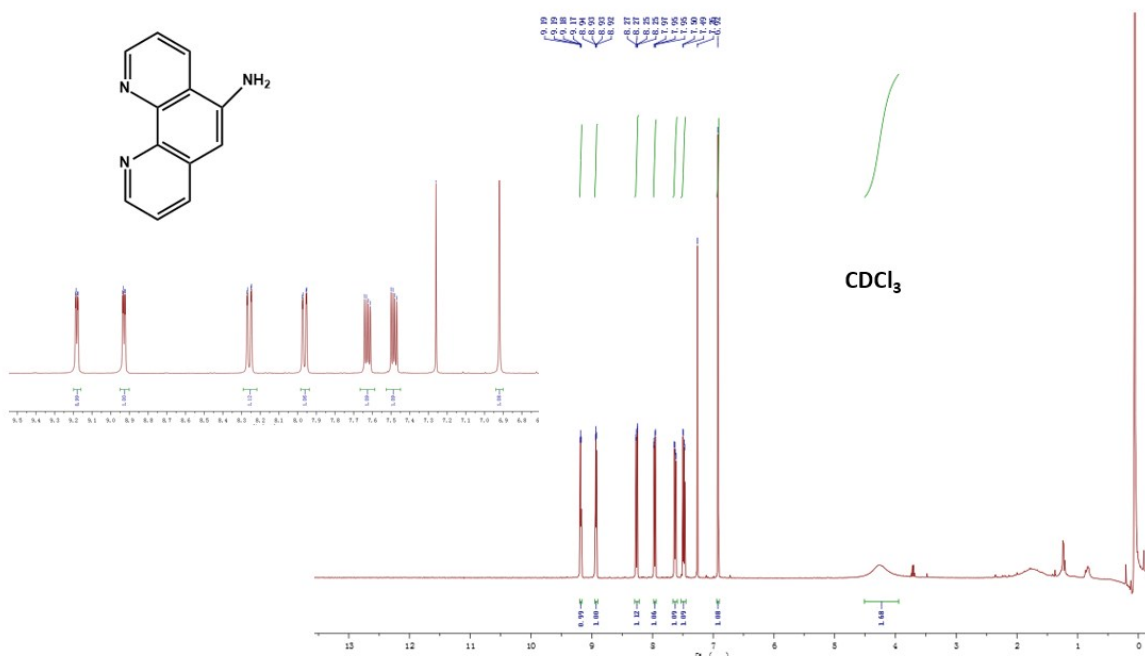

Fig. S3  $^1\text{H}$  NMR spectrum of compound 3.

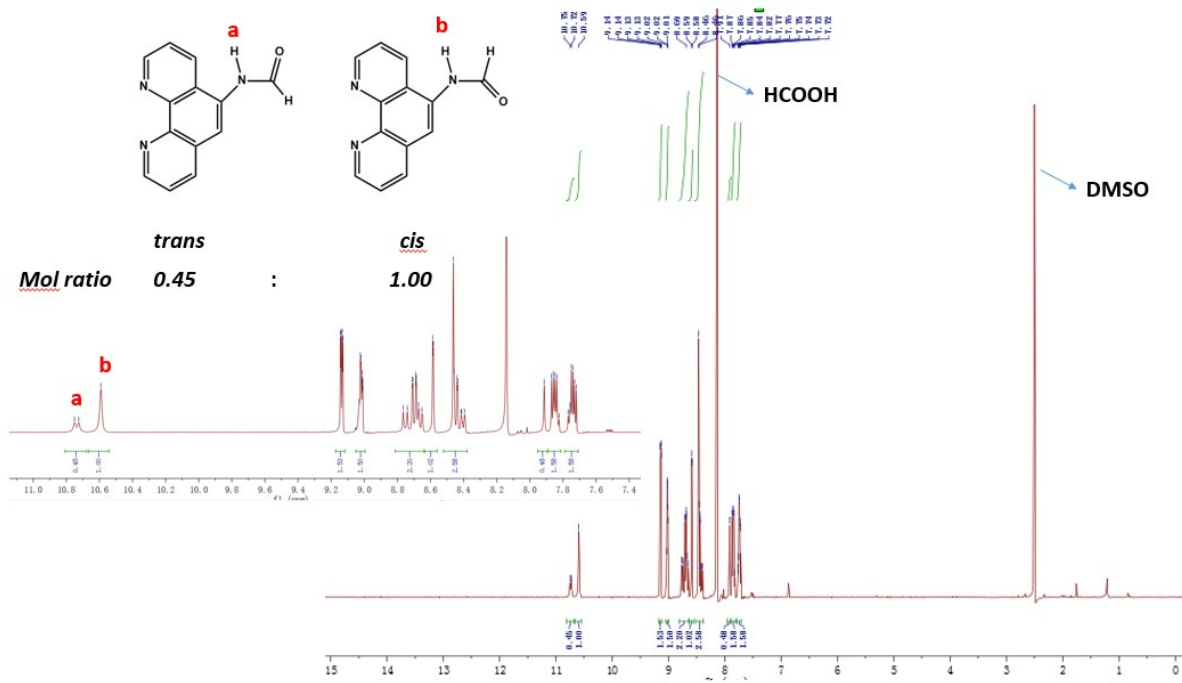

Fig. S4  $^1\text{H}$  NMR spectrum of compound **4** (in DMSO).



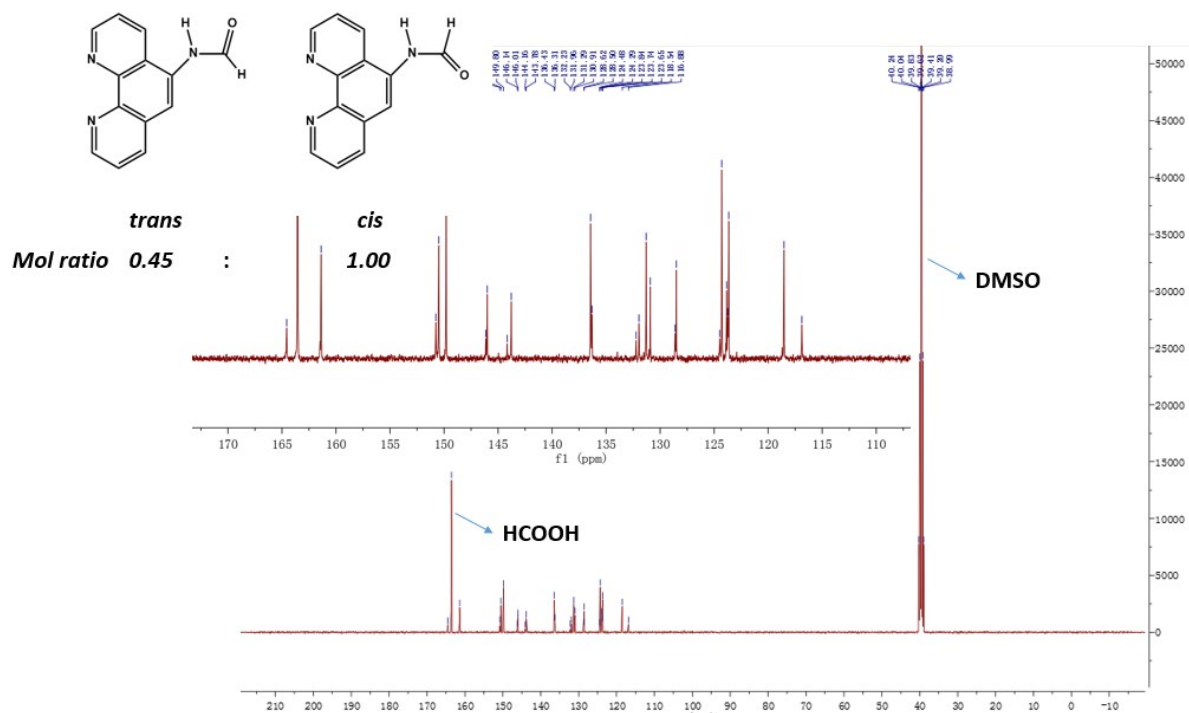





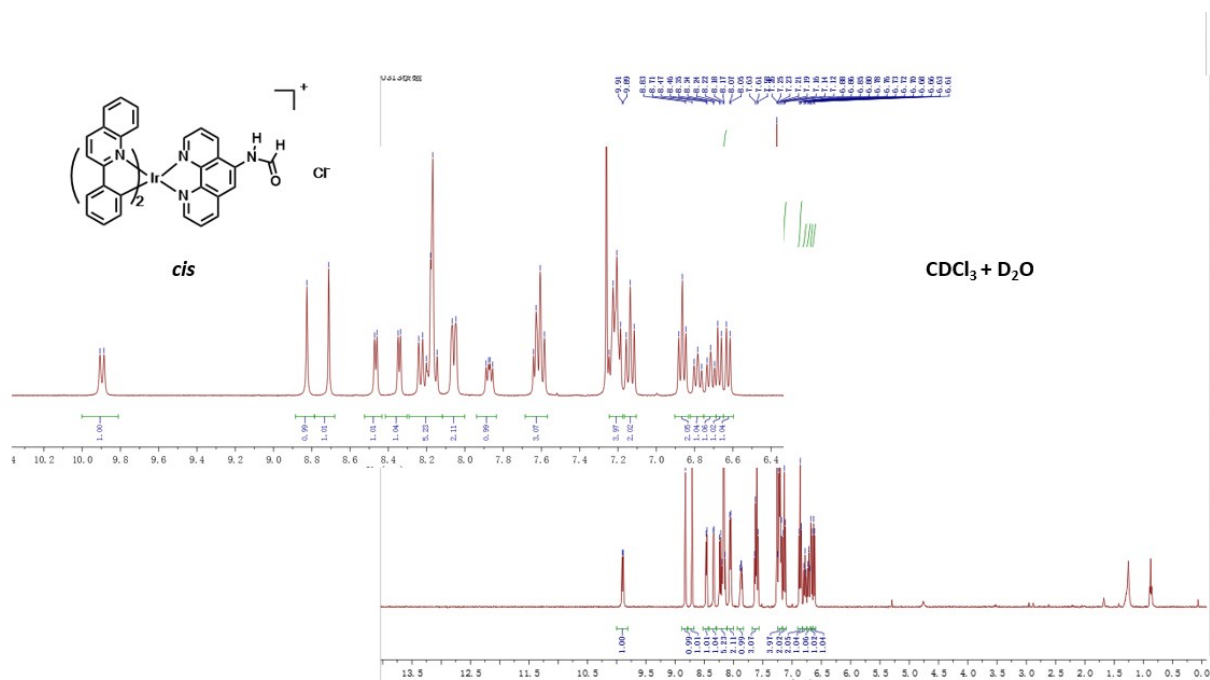

Fig. S8 <sup>1</sup>H NMR spectrum of complex 9 (in CDCl<sub>3</sub> + D<sub>2</sub>O).

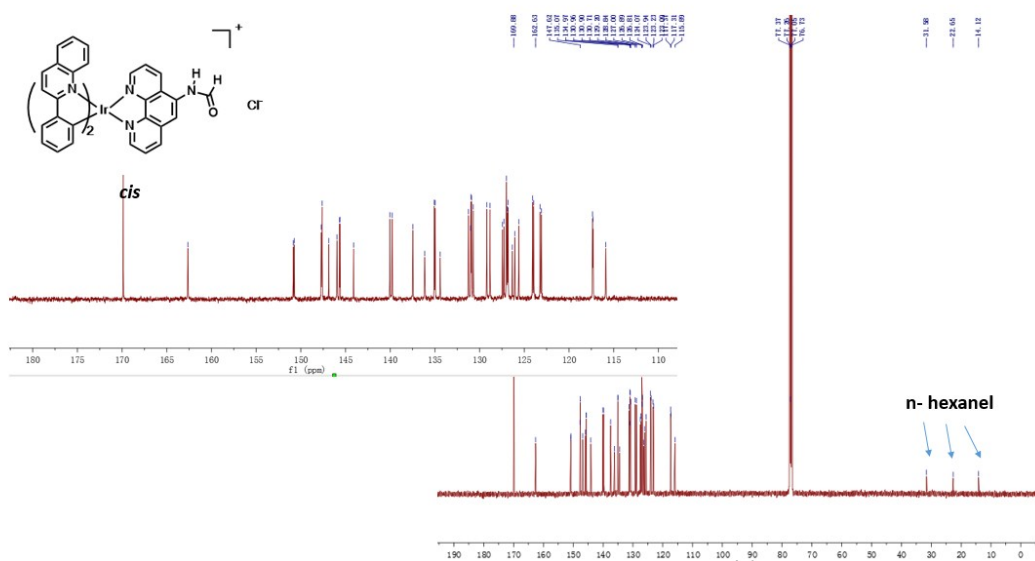



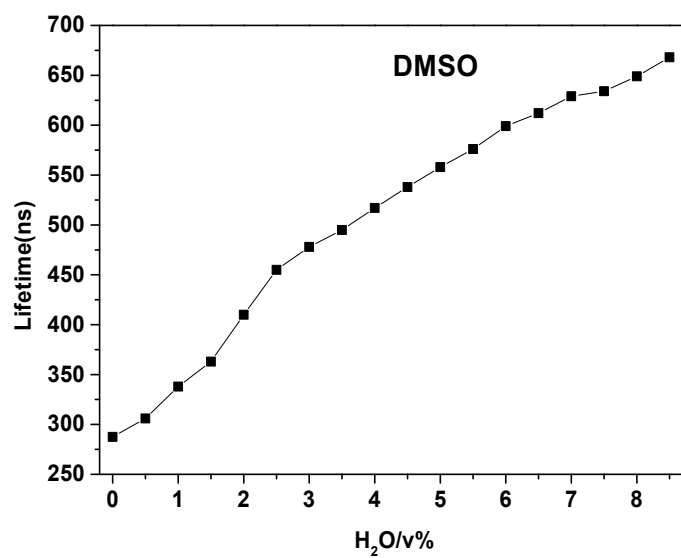

**Fig. S11** Lifetime titration curve of DMSO solution ( $1.0 \times 10^{-5}$  mol/L) of complex **9** containing  $F^-$  (0.2 equiv.) with different contents of water.
